# Supplementary material
Source: PubMed Central journal article supplement (PMC3060762)
Supplement: NIHMS276845-supplement-1.pdf [file NIHMS276845-supplement-1.pdf]

## ONLINE DATA SUPPLEMENT

### Effects of Human C-Reactive Protein on Pathogenesis of Features of the Metabolic Syndrome

**Running title:** CRP and the metabolic syndrome

Michal Pravenec<sup>1</sup>, Takashi Kajiya<sup>2</sup>, Václav Zidek<sup>1</sup>, Vladimír Landa<sup>1</sup>, Petr Mlejnek<sup>1</sup>, Miroslava Šimáková<sup>1</sup>, Jan Šilhavý<sup>1,3</sup>, Hana Malínská<sup>4</sup>, Olena Oliyarnyk<sup>4</sup>, Ludmila Kazdová<sup>4</sup>, Jianglin Fan<sup>5</sup>, Jiaming Wang<sup>2</sup>, Theodore W. Kurtz<sup>2</sup>

<sup>1</sup>Institute of Physiology, Academy of Sciences of the Czech Republic, Prague, Czech Republic; <sup>2</sup>Department of Laboratory Medicine, University of California, San Francisco, U.S.A; <sup>3</sup>Czech University of Life Sciences, FAFNR, Prague, Czech Republic; <sup>4</sup>Institute for Clinical and Experimental Medicine, Prague, Czech Republic; <sup>5</sup>University of Yamanashi, Japan

**Address for correspondence:**

Michal Pravenec

Institute of Physiology, Academy of Sciences of the Czech Republic

Videnska 1083, 14220 Prague 4, Czech Republic

Phone: (420)241062297; Fax: (420)241062488; Email: [pravenec@biomed.cas.cz](mailto:pravenec@biomed.cas.cz)

## **Supplementary Methods**

### ***Oral glucose tolerance testing***

Oral glucose tolerance tests were performed using a glucose load of 300 mg/100 g body weight after overnight fasting. Blood was drawn from the tail without anesthesia before the glucose load (0 min time point) and at 30, 60, and 120 min thereafter.

### ***Skeletal muscle insulin sensitivity***

Insulin stimulated nonoxidative glucose metabolism was determined in isolated soleus muscle by measuring the incorporation of  $^{14}\text{C}$ -U glucose into glycogen. The soleus muscles were attached to a stainless steel frame in situ at in vivo length by special clips and separated from other muscles and tendons and immediately incubated for 2 h in Krebs-Ringer bicarbonate buffer, pH 7.4, gaseous phase 95%  $\text{O}_2$  and 5%  $\text{CO}_2$  that contained 5.5 mM unlabeled glucose, 0.5  $\mu\text{Ci/ml}$  of  $^{14}\text{C}$ -U glucose, and 3 mg/ml bovine serum albumin (Armour, Fraction V) with or without 250  $\mu\text{units/ml}$  insulin. After 2 h incubation, glycogen was extracted and glucose incorporation into glycogen determined.

### ***Biochemical analyses***

Rat serum CRP and human serum CRP were measured using ELISA kits (Alpha Diagnostics International, San Antonio, U.S.A.). Blood glucose levels were measured by the glucose oxidase assay (Pliva-Lachema, Brno, Czech Republic) using tail vein blood drawn into 5% trichloroacetic acid and promptly centrifuged. NEFA levels were determined using an acyl-CoA oxidase-based colorimetric kit (Roche Diagnostics GmbH, Mannheim, Germany). Serum triglyceride concentrations were measured by standard enzymatic methods (Pliva-Lachema, Brno, Czech Republic). Serum insulin concentrations were determined using a rat insulin ELISA kit (Mercodia, Uppsala, Sweden). Serum adiponectin was determined with a rat ELISA kit (B-Bridge International, Inc., Mountain View, U.S.A.). Serum IL6 and  $\text{TNF}\alpha$  were measured by rat ELISA kits (BioSource International, Inc., Camarillo, U.S.A.).

### ***Tissue triglyceride measurements***

For determination of triglycerides in liver and soleus muscle, tissues were powdered under liquid  $\text{N}_2$  and extracted for 16 h in chloroform:methanol, after which 2%  $\text{KH}_2\text{PO}_4$  was added and the solution was centrifuged. The organic phase was removed and evaporated under  $\text{N}_2$ . The resulting pellet was dissolved in isopropyl alcohol, and triglyceride content was determined by enzymatic assay (Pliva-Lachema, Brno, Czech Republic).

### ***Blood pressure measurement***

Arterial blood pressures were measured continuously by radiotelemetry in paired experiments between conscious, unrestrained male rats. All rats were allowed to recover for at least 7 days after surgical implantation of radiotelemetry transducers before the start of blood pressure recordings. Pulsatile pressures were recorded in 5-second bursts every 10 minutes throughout the day and night, and 24-hour averages for systolic and diastolic arterial blood pressure were calculated for each rat for 1 week periods. After measuring blood pressure for two weeks, all rats were given 1% NaCl for drinking instead of tap water for an additional week of blood pressure measurements to test for effects of human CRP on blood pressure salt-sensitivity. The results from each rat in the same group were then averaged to obtain the group means.

### ***Parameters of oxidative stress***

The activity of superoxide dismutase (SOD) was analyzed using the reaction of blocking nitrotetrazolium blue reduction and nitroformazan formation. Catalase (CAT) activity measurement was based on the ability of H<sub>2</sub>O<sub>2</sub> to produce with ammonium molybdate a color complex detected spectrophotometrically. The activity of seleno-dependent glutathione peroxidase (GSH-Px) was monitored by oxidation of glutathione by Ellman reagent (0.01M solution of 5,5'-dythiobis-2 nitrobenzoic acid). The level of GSH was determined in the reaction of SH-groups using Ellman reagent. Glutathione reductase (GR) activity was measured by the decrease of absorbance at 340 nm using a millimolar extinction coefficient of 6220 M<sup>-1</sup>cm<sup>-1</sup> for NADPH (using Sigma assay kit). The levels of conjugated dienes (CD) were analyzed by extraction in the media (heptane:isopropanol = 2:1) and measured spectrophotometrically in the heptane layer. The levels of thiobarbituric acid reactive substances (TBARS) were determined by the reaction with thiobarbituric acid.

***Histopathological examination.***

Organs from each of three males of SHR-CRP and SHR strains, four months of age were collected immediately after euthanasia with ether overdose. The tissues were fixed in 10% buffered formalin. Samples were processed by the common paraffin technique and histological slices 5 µm thick were stained with hematoxylin and eosin, with blue trichrome and with PAS reaction as indicated.
